# Supplementary material for: Sustainable high-efficiency removal of cationic and anionic dyes using new super adsorbent biochar: performance, isotherm, kinetic and thermodynamic evaluation
Source: Royal Society of Chemistry journal article supplement (doi:10.1039/d3ew00464c), 2023-01-01
Supplement: d3ew00464c1.pdf [file d3ew00464c1.pdf]

## Sustainable high-efficiency removal of cationic and anionic dye using new super adsorbent biochar: performance, isotherm, kinetic and thermodynamic evaluation

Elias Mosaffa<sup>a, b, c</sup>, Atanu Banerjee<sup>a\*</sup>, Hossein Ghafuri<sup>c</sup>

<sup>a</sup>Dr. K. C. Patel R & D Centre, P D Patel Institute of Applied Sciences, Charotar University of Science and Technology (CHARUSAT), P.O. Box 388 421 Anand, Gujrat, India.

<sup>b</sup>P D Patel Institute of Applied Sciences, Charotar University of Science and Technology (CHARUSAT), P.O. Box 388 421 Anand, Gujrat, India.

<sup>c</sup>Catalysts and Organic Synthesis Research Laboratory, Department of Chemistry, Iran University of Science and Technology, P.O. Box 16846, Tehran, I. R., Iran

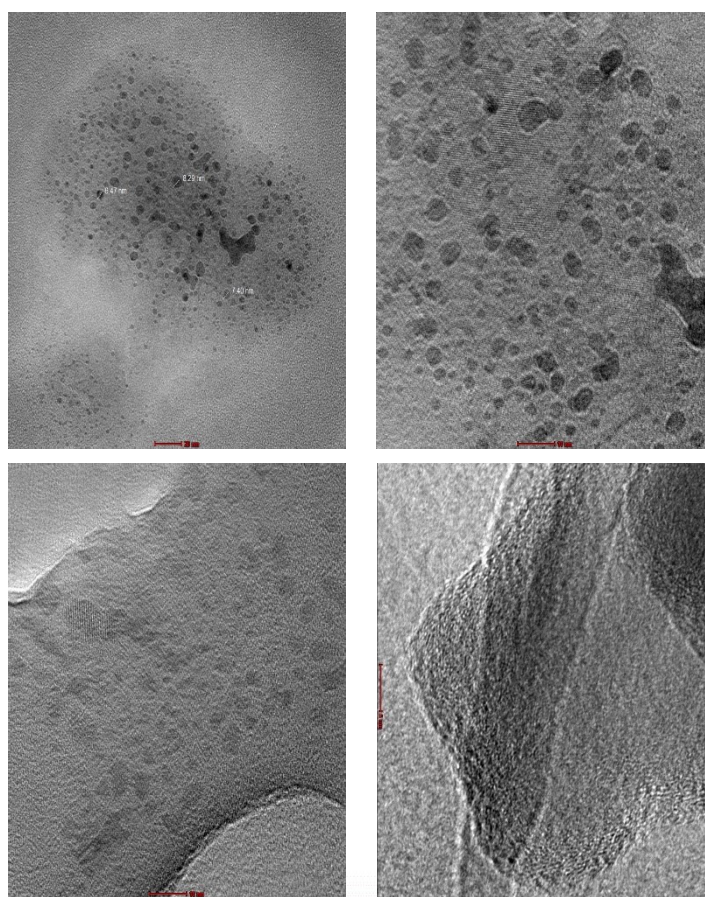

Fig. S1 The TEM

micrographs.

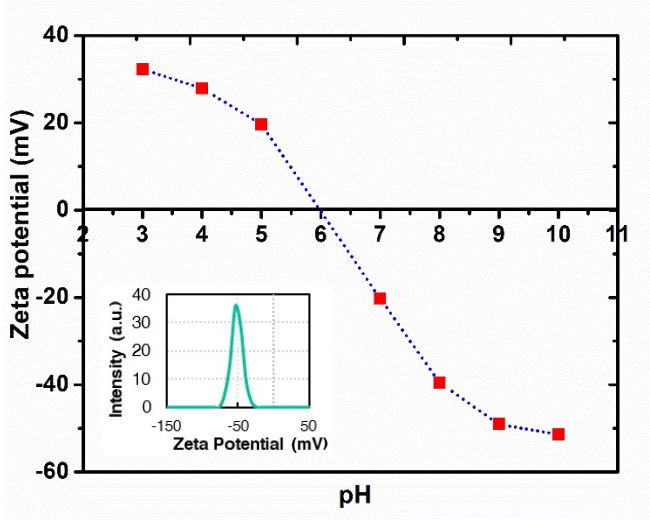

Fig. S2 Zeta potential result as a function of pH.

Table S1 Comparative analysis of adsorbent with the reported values for the  $q_{\max}$  of MG and CR using various adsorbents.

| Adsorbent                                                 | Dye | $q_e$ | Ref        |
|-----------------------------------------------------------|-----|-------|------------|
| Cd zeolitic imidazolate MOF                               | MG  | 3324  | 1          |
| Lignin-inspired porous polymer                            | MG  | 1449  | 2          |
| Zeolitic imidazole framework (ZIF-67)                     | MG  | 2430  | 3          |
| High metals-containing coal gasification fine slag (CGFS) | MG  | 1787  | 4          |
| Mesoporous Fe-silica aerogel composite with phenomenal    | MG  | 1592  | 5          |
| Oxidized mesoporous carbon                                | MG  | 1265  | 6          |
| Fe/Al Di-Metal Nanostructured Composite                   | CR  | 411   | 7          |
| MgAl-LDH nanohydroxalcalite-like                          | CR  | 769   | 8          |
| peony seeds shell activated carbon                        | CR  | 2003  | 9          |
| Potassium citrate-derived porous carbon                   | CR  | 652   | 10         |
| activated carbon prepared from Aloe vera leaves shell     | CR  | 1850  | 11         |
| Ice-Bio 350                                               | MG  | 10042 | This study |
| Ice-Bio 700                                               | MG  | 10596 |            |
| Ice-Bio 700                                               | CR  | 7094  |            |

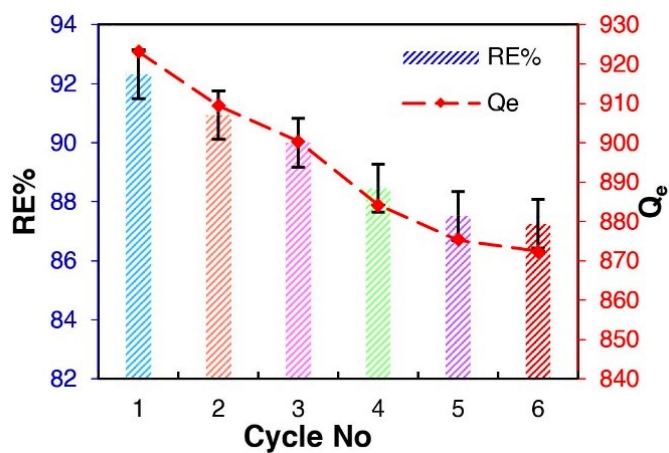

Fig. S3 Reusability of Ice-Bio in MG removal through six continuous cycles.

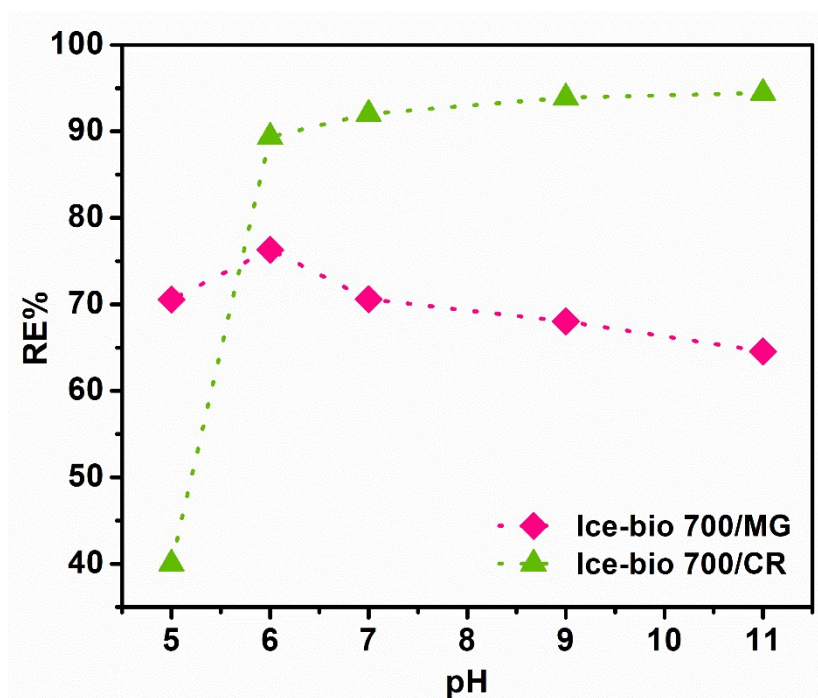

Fig. S4 Removal efficiency of MG and CR in mixed dye system experiment at various pH.

1. S. A. Sadat, A. M. Ghaedi, M. Panahimehr, M. M. Baneshi, A. Vafaei and M. Ansarizadeh, Rapid room-temperature synthesis of cadmium zeolitic imidazolate framework nanoparticles based on 1, 1'-carbonyldiimidazole as ultra-high-efficiency adsorbent for ultrasound-assisted removal of malachite green dye, *Applied Surface Science*, 2019, **467**, 1204-1212.
2. C. Jin, Y. Liu, J. Fan, T. Liu, G. Liu, F. Chu and Z. Kong, Lignin-inspired porous polymer networks as high-performance adsorbents for the efficient removal of malachite green dye, *Colloids and Surfaces A: Physicochemical and Engineering Aspects*, 2022, **643**, 128760.
3. K. Y. Lin and H. A. Chang, Ultra-high adsorption capacity of zeolitic imidazole framework-67 (ZIF-67) for removal of malachite green from water, *Chemosphere*, 2015, **139**, 624-631.
4. Y. Dong, F. Guo, R. Shu, K. Dong, Q. Qiao, S. Liu, L. Xu and Y. Bai, Evaluation of the High Metals-Containing Coal Gasification Fine Slag as a High-Performance Adsorbent for Malachite Green Adsorption, *Waste and Biomass Valorization*, 2022, **13**, 4897-4909.
5. R. Tang, W. Hong, C. Srinivasakannan, X. Liu, X. Wang and X. Duan, A novel mesoporous Fe-silica aerogel composite with phenomenal adsorption capacity for malachite green, *Separation and Purification Technology*, 2022, **281**, 119950.
6. N. B. Swan and M. A. A. Zaini, Adsorption of malachite green and congo red dyes from water: recent progress and future outlook, *Ecological chemistry and engineering S*, 2019, **26**, 119-132.
7. K. L. Muedi, V. Masindi, J. P. Maree, N. Haneklaus and H. G. Brink, Effective Adsorption of Congo Red from Aqueous Solution Using Fe/Al Di-Metal Nanostructured Composite Synthesised from Fe (III) and Al (III) Recovered from Real Acid Mine Drainage, *Nanomaterials*, 2022, **12**, 776.

8. M. A. Farghali, A. M. Selim, H. F. Khater, N. Bagato, W. Alharbi, K. H. Alharbi and I. T. Radwan, Optimized adsorption and effective disposal of Congo red dye from wastewater: Hydrothermal fabrication of MgAl-LDH nanohydroxalcalite-like materials, *Arabian Journal of Chemistry*, 2022, **15**, 104171.
9. P. Liu, T. Song, R. Deng, X. Hou and J. Yi, The efficient removal of congo red and ciprofloxacin by peony seeds shell activated carbon with ultra-high specific surface area, *Environmental Science and Pollution Research*, 2023, **30**, 53177-53190.
10. S. Wang, T. Zhang, J. Li, Y. Hua, J. Dou, X. Chen and S. Li, Potassium citrate-derived porous carbon with high CO<sub>2</sub> capture and Congo red adsorption performance, *Environmental Sciences Europe*, 2023, **35**, 1-13.
11. Y. O. Khaniabadi, M. J. Mohammadi, M. Shegerd, S. Sadeghi, S. Saeedi and H. Basiri, Removal of Congo red dye from aqueous solutions by a low-cost adsorbent: activated carbon prepared from Aloe vera leaves shell, *Environmental Health Engineering and Management Journal*, 2017, **4**, 29-35.
